# Supplementary material
Source: ML conference proceedings conference paper supplement (https://proceedings.neurips.cc/paper_files/paper/2023/hash/c6ec1844bec96d6d32ae95ae694e23d8-Abstract.html)
Supplement: Supplementary file 1 [file c6ec1844bec96d6d32ae95ae694e23d8-Supplemental-Datasets_and_Benchmarks.zip]

Archive with 4 entries (4 files):
- ceval-appendix.pdf
- __MACOSX/._ceval-appendix.pdf
- ceval-datacard.pdf
- __MACOSX/._ceval-datacard.pdf
